# Supplementary material for: Structural and kinetic analysis of the COP9-Signalosome activation and the cullin-RING ubiquitin ligase deneddylation cycle
Source: eLife journal article supplement (doi:10.7554/elife.12102), 2016-03-31
Supplement: supp [file elife-12102-supp-v1.zip]

| Table S1: Cross-links within CSN5H138A-SCF-N8Sbp2/Cks1. |          |          |          |          |        |          |       |                         |
|---------------------------------------------------------|----------|----------|----------|----------|--------|----------|-------|-------------------------|
| Id                                                      | Protein1 | Protein2 | Residue1 | Residue2 | deltaS | Id-Score | FDR   | distance ( in Angstrom) |
| TFNIKNDFTEEEEQVR-RPKLNR-a5-b3                           | Skp1     | Skp2     | 142      | 86       | 0.36   | 55.77    | 0     | residues not modeled    |
| SQEGRPVQVIGALIGKQEGR-MLATLFKDER-a16-b7                  | Csn6     | Csn4     | 75       | 251      | 0.73   | 49.35    | 0     | 21                      |
| GSDKDFVIVR-GKTPPEIR-a4-b2                               | Skp2     | Skp1     | 77       | 130      | 0.4    | 42.38    | 0     | residues not modeled    |
| YTALDKWTNQLNSLNQAVVSK-STTFEKSLLMGK-a6-b6                | Csn2     | Csn1     | 426      | 418      | 0.16   | 41.71    | 0     | 13                      |
| KTFNIKNDFTEEEEQVR-RPKLNR-a6-b3                          | Skp1     | Skp2     | 142      | 86       | 0.64   | 41.56    | 0     | residues not modeled    |
| YTALDKWTNQLNSLNQAVVSK-STTFEKSLLMGKEFQR-a6-b6            | Csn2     | Csn1     | 426      | 418      | 0.88   | 41.31    | 0     | 13                      |
| KTFNIKNDFTEEEEQVR-RPKLNR-a1-b3                          | Skp1     | Skp2     | 137      | 86       | 0.33   | 40.39    | 0     | residues not modeled    |
| IPPAIKSANSELGGIWSVGQR-KQPLR-a6-b1                       | Csn8     | Csn3     | 65       | 152      | 0.44   | 39.52    | 0.042 | 15                      |
| MFQDIGVSKDLNEQFKK-LGKLYLER-a9-b3                        | Cul1     | Csn2     | 552      | 157      | 0.38   | 39.19    | 0.042 | 16                      |
| GKTPEEIRK-RPKLNR-a2-b3                                  | Skp1     | Skp2     | 130      | 86       | 0.48   | 38.17    | 0.042 | residues not modeled    |
| TWELANNMQEAQSIDEIYKYDKK-VKLTGTGK-a19-b2                 | Csn5     | Nedd8    | 30       | 6        | 0.41   | 38.15    | 0.042 | 27                      |
| INFKLTNFPPEMMNR-DLNEQFKK-a4-b7                          | Csn2     | Cul1     | 81       | 559      | 0.84   | 37.89    | 0.042 | 12                      |
| SQNPHGLKQIGLDQIWDDLRL-RPKLNR-a8-b3                      | Cul1     | Skp2     | 50       | 86       | 0.51   | 37.24    | 0.042 | residues not modeled    |
| TWELANNMQEAQSIDEIYKYDKK-VKLTGTGK-a22-b2                 | Csn5     | Nedd8    | 33       | 6        | 0.52   | 37.1     | 0.042 | 9                       |
| GKTPEEIR-RPKLNR-a2-b3                                   | Skp1     | Skp2     | 130      | 86       | 0      | 36.98    | 0.042 | residues not modeled    |
| TQQQVEAEVTNIKK-KSEDKLAK-a13-b1                          | Csn7     | Csn5     | 217      | 295      | 0.54   | 36.05    | 0.042 | residues not modeled    |
| RAKAMMLR-KNLQK-a3-b1                                    | Csn1     | Skp2     | 431      | 295      | 0.77   | 35.49    | 0.042 | 34                      |
| LTKTFLTLQLDMSLR-STTFEKSLLMGK-a3-b6                      | Csn3     | Csn1     | 349      | 418      | 0.34   | 35.44    | 0.042 | 14                      |
| MFQDIGVSKDLNEQFKK-LGKLYLEREEYGGK-a9-b3                  | Cul1     | Csn2     | 552      | 157      | 0.76   | 35.41    | 0.042 | 16                      |
| LSDPVNTLAKNSNLVR-KQPLR-a11-b1                           | Skp2     | Csn3     | 228      | 152      | 0.38   | 35.08    | 0.042 | 89                      |
| SMGSQEDDSGNKPSSYS-TQQQVEAEVTNIKK-a12-b13                | Csn3     | Csn7     | 455      | 217      | 0      | 34.53    | 0.042 | residues not modeled    |
| DGMVSFHDNPEKYNNPAMLHNIDQEMLK-SLLMGKEFQR-a12-b6          | Csn3     | Csn1     | 403      | 424      | 0.34   | 34       | 0.042 | 21                      |
| TISAGKVNLGAFR-ANQYKENHNR-a6-b5                          | Csn5     | Csn7     | 180      | 199      | 0.27   | 33.99    | 0.042 | residues not modeled    |
| AMDQEITVNPQFVQKSMGSQEDDSGNKPSSYS-KNLQK-a15-b1           | Csn3     | Skp2     | 443      | 295      | 0.36   | 32.82    | 0.042 | 22                      |
| NLVNKHSETFTR-KNLQK-a5-b1                                | Csn3     | Skp2     | 318      | 295      | 0.31   | 32.53    | 0.051 | 55                      |
| IDQVNQLLELDHQKR-STTFEKSLLMGK-a14-b6                     | Csn2     | Csn1     | 415      | 418      | 0.63   | 32.43    | 0.051 | 21                      |
| NLVNKHSETFTR-RPKLNR-a5-b3                               | Csn3     | Skp2     | 318      | 86       | 0.31   | 32.43    | 0.051 | residues not modeled    |
| FIKPLSNAYHELAQVYSTNNPSEL-KNLQK-a3-b1                    | Csn3     | Skp2     | 291      | 295      | 0.32   | 32.11    | 0.051 | 39                      |
| SMGSQEDDSGNKPSSYS-KSEDKLAK-a12-b5                       | Csn3     | Csn5     | 455      | 299      | 0.27   | 31.89    | 0.051 | residues not modeled    |
| AMDQEITVNPQFVQKSMGSQEDDSGNKPSSYS-NQIHVKSPPR-a15-b6      | Csn3     | Csn1     | 443      | 447      | 0.32   | 31.83    | 0.051 | residues not modeled    |
| FINNNAVTKMAQSSSK-VKLTGTGK-a9-b2                         | Cul1     | Nedd8    | 447      | 6        | 0.5    | 31.57    | 0.051 | 62                      |
| NQIHVKSPPREGSQGELTPANSQSR-LSDPVNTLAKNSNLVR-a6-b11       | Csn1     | Skp2     | 447      | 228      | 0.79   | 31.53    | 0.051 | residues not modeled    |
| DGMVSFHDNPEKYNNPAMLHNIDQEMLK-KPVAGALDVSFNK-a12-b1       | Csn3     | Csn8     | 403      | 166      | 0.3    | 31.47    | 0.051 | residues not modeled    |
| LKAMDQEITVNPQFVQK-ANQYKENHNR-a2-b5                      | Csn3     | Csn7     | 428      | 199      | 0.93   | 31.15    | 0.051 | 10                      |
| DGMVSFHDNPEKYNNPAMLHNIDQEMLK-STTFEKSLLMGK-a12-b6        | Csn3     | Csn1     | 403      | 418      | 0.28   | 30.6     | 0.051 | 17                      |
| LKAMDQEITVNPQFVQK-KSEDKLAK-a2-b1                        | Csn3     | Csn5     | 428      | 295      | 0.43   | 30.54    | 0.051 | residues not modeled    |
| LSDPVNTLAKNSNLVR-NLVNKHSETFTR-a11-b5                    | Skp2     | Csn3     | 228      | 318      | 0.46   | 30.49    | 0.051 | 69                      |
| LKAMDQEITVNPQFVQK-KSEDKLAK-a2-b5                        | Csn3     | Csn5     | 428      | 299      | 0.45   | 30.4     | 0.051 | residues not modeled    |
| IDQVNQLLELDHQKR-TISAGKVNLGAFR-a14-b6                    | Csn2     | Csn5     | 415      | 180      | 0.49   | 30.28    | 0.051 | 28                      |

| Table S2: Cross-links within CSN5H138A-SCFSkp2/Cks1. |          |           |          |          |        |          |       |
|------------------------------------------------------|----------|-----------|----------|----------|--------|----------|-------|
| Id                                                   | Protein1 | Protein2  | Residue1 | Residue2 | deltaS | Id-Score | FDR   |
| TFNIKNDFTEEEEAQVR-RPKLNR-a5-b3                       | Skp1     | Skp2      | 142      | 86       | 0.35   | 52.26    | 0     |
| SQEGRPVQVIGALIGKQEGR-MLATLFKDER-a16-b7               | Csn6     | Csn4      | 75       | 251      | 0.78   | 44.69    | 0     |
| IPPAIKSANSELGGIWSVGQR-KQPLR-a6-b1                    | Csn8     | Csn3      | 65       | 152      | 0.38   | 44.31    | 0     |
| GKTPEEIRK-RPKLNR-a2-b3                               | Skp1     | Skp2      | 130      | 86       | 0.42   | 40.01    | 0     |
| GKTPEEIR-RPKLNR-a2-b3                                | Skp1     | Skp2      | 130      | 86       | 0.47   | 38.28    | 0     |
| KTFNIKNDFTEEEEAQVR-RPKLNR-a6-b3                      | Skp1     | Skp2      | 142      | 86       | 0.34   | 38.13    | 0     |
| KTFNIKNDFTEEEEAQVR-RPKLNR-a1-b3                      | Skp1     | Skp2      | 137      | 86       | 0.45   | 37.71    | 0     |
| LTKTFLTLSQLDMASR-STTFEKSLLMGK-a3-b6                  | Csn3     | Csn1      | 349      | 418      | 0.24   | 37.37    | 0     |
| AMDQEITVNPQFVQKSMGSEQEDDSGNKPSSYS-NQIHVKSPPR-a15-b6  | Csn3     | Csn1      | 443      | 447      | 0.27   | 37.29    | 0     |
| TISAGKVNLAGFR-ANQYKENHNR-a6-b5                       | Csn5     | Csn7      | 180      | 199      | 0.66   | 36.95    | 0     |
| NLVNKHSETFTR-NQIHVKSPPR-a5-b6                        | Csn3     | Csn1      | 318      | 447      | 0.61   | 36.94    | 0     |
| YTALDKWTNQLNSLNQAVVSK-STTFEKSLLMGK-a6-b6             | Csn2     | Csn1      | 426      | 418      | 0.28   | 36.42    | 0     |
| MFQDIGVSKDLNEQFK-LGKLYLER-a9-b3                      | Cul1     | Csn2      | 552      | 157      | 0.29   | 36.17    | 0     |
| NLVNKHSETFTR-VDSHSKILYAR-a5-b6                       | Csn3     | Csn1      | 318      | 402      | 0.72   | 35.43    | 0     |
| NLVNKHSETFTR-RPKLNR-a5-b3                            | Csn3     | Skp2      | 318      | 86       | 0.51   | 35.22    | 0     |
| NLVNKHSETFTR-KLSEATR-a5-b1                           | Csn3     | Csn1      | 318      | 81       | 0.57   | 34.91    | 0.043 |
| LKAMDQEITVNPQFVQK-ANQYKENHNR-a2-b5                   | Csn3     | Csn7      | 428      | 199      | 0.43   | 34.55    | 0.043 |
| LSDPIVNTLAKNSNLVR-KQPLR-a11-b1                       | Skp2     | Csn3      | 228      | 152      | 0.38   | 34.49    | 0.043 |
| DGMVFSFHDNPEKYNNPAMLHNIDQEMLK-SLLMGKEFQR-a12-b6      | Csn3     | Csn1      | 403      | 424      | 0.21   | 34.4     | 0.043 |
| TQQQVEAEVTNIKK-KSEDKLAK-a13-b5                       | Csn7     | Csn5      | 217      | 299      | 0.56   | 34.07    | 0.043 |
| TQQQVEAEVTNIKK-KSEDKLAK-a13-b1                       | Csn7     | Csn5      | 217      | 295      | 0.56   | 34.06    | 0.043 |
| IDQVNQLLELDHQR-WLKTR-a14-b3                          | Csn2     | Rbx1      | 415      | 145      | 0.72   | 33.99    | 0.043 |
| IDQVNQLLELDHQR-TISAGKVNLAGFR-a14-b6                  | Csn2     | Csn5      | 415      | 180      | 0.73   | 33.95    | 0.043 |
| NQIHVKSPPREGSQELTPANSQSR-SMGSEQEDDSGNKPSSYS-a6-b12   | Csn1     | Csn3      | 447      | 455      | 0.29   | 33.43    | 0.083 |
| SQNPHGLKQIGLDQIWDDL-RPKLNR-a8-b3                     | Cul1     | Skp2      | 50       | 86       | 0.57   | 32.68    | 0.12  |
| SMGSEQEDDSGNKPSSYS-NQIHVKSPPR-a12-b6                 | Csn3     | Csn1      | 455      | 447      | 0.2    | 31.16    | 0.154 |
| IDQVNQLLELDHQR-STTFEKSLLMGK-a14-b6                   | Csn2     | Csn1      | 415      | 418      | 0.64   | 30.33    | 0.185 |
| EGIPPPQQRLIYSGKQMNDEK-QILEKAIQLSGAEQLEALK-a15-b5     | Nedd8    | Csn4      | 48       | 32       | 0.54   | 28.94    | 0.243 |
| IDQVNQLLELDHQR-NQIHVKSPPR-a14-b6                     | Csn2     | Csn1      | 415      | 447      | 0.67   | 28.68    | 0.243 |
| TQVLIKLIKPYTR-MRKVLK-a6-b3                           | Csn2     | Cul1,Rbx1 | 361      | 760, 3   | 0.74   | 28.38    | 0.243 |
| LSDPIVNTLAKNSNLVR-NLVNKHSETFTR-a11-b5                | Skp2     | Csn3      | 228      | 318      | 0.42   | 27.13    | 0.243 |
| GNQLQEFAAMLMPHQKATTADGSSILDR-WLKTR-a16-b3            | Csn4     | Rbx1      | 290      | 145      | 0.43   | 26.73    | 0.243 |
| TISAGKVNLAGFR-MLATLFKDER-a6-b7                       | Csn5     | Csn4      | 180      | 251      | 0.67   | 25.99    | 0.243 |
| AMDQEITVNPQFVQKSMGSEQEDDSGNKPSSYS-KNLQK-a15-b1       | Csn3     | Skp2      | 443      | 295      | 0.26   | 25.57    | 0.243 |
| KTLKATASSSAQEMEQLAER-MAQSSSKSPELLAR-a4-b7            | Csn7     | Cul1      | 221      | 454      | 0.57   | 25.06    | 0.263 |

| Table S3: Cross-links within CSN-Cul1/Rbx1.             |          |          |          |          |        |          |       |
|---------------------------------------------------------|----------|----------|----------|----------|--------|----------|-------|
| Id                                                      | Protein1 | Protein2 | Residue1 | Residue2 | deltaS | Id-Score | FDR   |
| SQEGRPVQVIGALIGKQEGR-MLATLFKDER-a16-b7                  | Csn6     | Csn4     | 75       | 251      | 0.76   | 42.99    | 0     |
| IPPAIKSANSELGGIWSVGQR-KQPLR-a6-b1                       | Csn8     | Csn3     | 65       | 152      | 0.37   | 42.99    | 0     |
| YTALDKWTNQLNSLNQAVVSK-STTFEKSLLMGK-a6-b6                | Csn2     | Csn1     | 426      | 418      | 0.1    | 42.93    | 0     |
| TISAGKVNLGAFR-ANQYKENHNR-a6-b5                          | Csn5     | Csn7     | 180      | 199      | 0.68   | 38.81    | 0     |
| NLVNKHSETFTR-KLSEATR-a5-b1                              | Csn3     | Csn1     | 318      | 81       | 0.34   | 38.52    | 0     |
| YTALDKWTNQLNSLNQAVVSK-STTFEKSLLMGKEFQR-a6-b6            | Csn2     | Csn1     | 426      | 418      | 0.91   | 38.29    | 0     |
| TISAGKVNLGAFR-MLATLFKDER-a6-b7                          | Csn5     | Csn4     | 180      | 251      | 0.63   | 36.72    | 0     |
| LTKTFLTSLQDMASR-STTFEKSLLMGK-a3-b6                      | Csn3     | Csn1     | 349      | 418      | 0.21   | 36.67    | 0     |
| LKAMDQEITVNPQFVQK-ANQYKENHNR-a2-b5                      | Csn3     | Csn7     | 428      | 199      | 0.91   | 36.53    | 0     |
| NLVNKHSETFTR-NQIHVKSPPR-a5-b6                           | Csn3     | Csn1     | 318      | 447      | 0.52   | 35.96    | 0     |
| TQQQVEAEVTNIKK-KSEDKLAK-a13-b5                          | Csn7     | Csn5     | 217      | 299      | 0.64   | 35.88    | 0     |
| IDQVNQLELDHQKR-TISAGKVNLGAFR-a14-b6                     | Csn2     | Csn5     | 415      | 180      | 0.6    | 35.55    | 0     |
| AMDQEITVNPQFVQKSMGSEQEDDSGNKPSSYS-DKLFNQINIS-a15-b2     | Csn3     | Csn5     | 443      | 326      | 0.9    | 34.64    | 0     |
| TQQQVEAEVTNIKK-KSEDKLAK-a13-b1                          | Csn7     | Csn5     | 217      | 295      | 0.56   | 34.53    | 0     |
| VDSHSKILYAR-ANQYKENHNR-a6-b5                            | Csn1     | Csn7     | 402      | 199      | 0.53   | 33.64    | 0     |
| NQIHVKSPPREGSQGELTPANSQSR-SMGSEQEDDSGNKPSSYS-a6-b12     | Csn1     | Csn3     | 447      | 455      | 0.55   | 33.34    | 0.048 |
| SMGSEQEDDSGNKPSSYS-NQIHVKSPPR-a12-b6                    | Csn3     | Csn1     | 455      | 447      | 0.22   | 33.07    | 0.048 |
| IDQVNQLELDHQKR-NQIHVKSPPR-a14-b6                        | Csn2     | Csn1     | 415      | 447      | 0.59   | 33.04    | 0.048 |
| IDQVNQLELDHQKR-WLKTR-a14-b3                             | Csn2     | Rbx1     | 415      | 145      | 0.71   | 31.99    | 0.048 |
| IDQVNQLELDHQKR-STTFEKSLLMGK-a14-b6                      | Csn2     | Csn1     | 415      | 418      | 0.6    | 31.51    | 0.048 |
| SMGSEQEDDSGNKPSSYS-TQQQVEAEVTNIKK-a12-b13               | Csn3     | Csn7     | 455      | 217      | 0      | 31.24    | 0.048 |
| LTWLQYLSKGELVTNCFKNR-QILEKAIQLSGAEQLEALK-a18-b5         | Cul1     | Csn4     | 633      | 32       | 0.32   | 30.34    | 0.087 |
| DGMVSFHDNPEKYNNPAMLHNIDQEMLK-SLLMGKEFQR-a12-b6          | Csn3     | Csn1     | 403      | 424      | 0.34   | 30.19    | 0.087 |
| KTLKATASSSAQEMEQLAER-MAQSSKSPELLAR-a4-b7                | Csn7     | Cul1     | 221      | 454      | 0.54   | 26.27    | 0.216 |
| NLVNKHSETFTR-ANQYKENHNR-a5-b5                           | Csn3     | Csn7     | 318      | 199      | 0.37   | 26.17    | 0.216 |
| DGMVSFHDNPEKYNNPAMLHNIDQEMLK-IDQVNQLELDHQKR-a12-b14     | Csn3     | Csn2     | 403      | 415      | 0.42   | 26.09    | 0.216 |
| SMGSEQEDDSGNKPSSYS-KSEDKLAK-a12-b5                      | Csn3     | Csn5     | 455      | 299      | 0      | 26.05    | 0.216 |
| AMDQEITVNPQFVQKSMGSEQEDDSGNKPSSYS-NQIHVKSPPREGSQGELTPAN | Csn3     | Csn1     | 443      | 447      | 0.27   | 25.01    | 0.216 |

| Table S4: Cross-links within CSN5H138A-SCF-N8Fbw7FL. |          |          |          |          |        |          |     |
|------------------------------------------------------|----------|----------|----------|----------|--------|----------|-----|
| Id                                                   | Protein1 | Protein2 | Residue1 | Residue2 | deltaS | Id-Score | FDR |
| YTALDKWTNQLNSLNQAVVSK-STTFEKSLLMGK-a6-b6             | Csn2     | Csn1     | 426      | 418      | 0.2    | 39.12    | 0   |
| IPPAIKSANSELGGIWSVGQR-KQPLR-a6-b1                    | Csn8     | Csn3     | 65       | 152      | 0.43   | 36.68    | 0   |
| NLVNKHSETFTR-KLDHGSEVR-a5-b1                         | Csn3     | Fbw7fl   | 318      | 208      | 0.67   | 33.36    | 0   |
| TISAGKVNLGAFR-ANQYKENHNR-a6-b5                       | Csn5     | Csn7     | 180      | 199      | 0.47   | 30.42    | 0   |
| FINNNAVTKMAQSSSK-VKTLTGK-a9-b2                       | Cul1     | Nedd8    | 447      | 6        | 0.54   | 30.4     | 0   |
| TQQQVEAEVTNIKK-KSEDKLAK-a13-b1                       | Csn7     | Csn5     | 217      | 295      | 0.6    | 29.4     | 0   |
| MAGEQKPSSNLEQFILLAK-SFSLGKKPCK-a6-b7                 | Csn7     | Fbw7fl   | 6        | 223      | 0.51   | 29.22    | 0   |
| YTALDKWTNQLNSLNQAVVSK-KAEARLLEEQR-a6-b1              | Csn2     | Cul1     | 426      | 300      | 0.27   | 29.15    | 0   |
| VEEKEGIPPPQQR-EEYGKLQKILR-a4-b5                      | Nedd8    | Csn2     | 33       | 167      | 0.94   | 28.92    | 0   |
| LTKTFLTLQLDMASR-STTFEKSLLMGK-a3-b6                   | Csn3     | Csn1     | 349      | 418      | 0.46   | 28.62    | 0   |

| Table S5: Cross-links within CSN5H138A-SCF-N8Fbw7trunc |          |          |          |          |        |          |     |
|--------------------------------------------------------|----------|----------|----------|----------|--------|----------|-----|
| Id                                                     | Protein1 | Protein2 | Residue1 | Residue2 | deltaS | Id-Score | FDR |
| SQEGRPVQVIGALIGKQEGR-MLATLFKDER-a16-b7                 | Csn6     | Csn4     | 75       | 251      | 0.72   | 44       | 0   |
| IPPAIKSANSELGGIWSVGQR-KQPLR-a6-b1                      | Csn8     | Csn3     | 65       | 152      | 0.52   | 40.55    | 0   |
| YTALDKWTNQLNSLNQAVVSK-STTFEKSLLMGK-a6-b6               | Csn2     | Csn1     | 426      | 418      | 0.18   | 38.91    | 0   |
| MFQDIGVSKDLNEQFK-LGKLYLER-a9-b3                        | Cul1     | Csn2     | 552      | 157      | 0.27   | 38.66    | 0   |
| IDQVNQLLELDHQKR-STTFEKSLLMGK-a14-b6                    | Csn2     | Csn1     | 415      | 418      | 0.56   | 36.03    | 0   |

| Table S6: Cross-links within CSN-Cul3/Rbx1         |          |          |          |          |        |          |     |
|----------------------------------------------------|----------|----------|----------|----------|--------|----------|-----|
| Id                                                 | Protein1 | Protein2 | Residue1 | Residue2 | deltaS | Id-Score | FDR |
| FYLAKHSGR-LGKLYLER-a5-b3                           | Cul3     | Csn2     | 579      | 157      | 0.76   | 45.11    | 0   |
| YTALDKWTNQLNSLNQAVVSK-STTFEKSLLMGK-a6-b6           | Csn2     | Csn1     | 426      | 418      | 0.27   | 44.01    | 0   |
| YTALDKWTNQLNSLNQAVVSK-STTFEKSLLMGKEFQR-a6-b6       | Csn2     | Csn1     | 426      | 418      | 0.83   | 41.73    | 0   |
| NLVNKHSETFTR-KGEVVDR-a5-b1                         | Csn3     | Cul3     | 318      | 211      | 0.37   | 41.42    | 0   |
| IPPAIKSANSELGGIWSVGQR-KQPLR-a6-b1                  | Csn8     | Csn3     | 65       | 152      | 0.88   | 40.9     | 0   |
| SQEGRPVQVIGALIGKQEGR-MLATLFKDER-a16-b7             | Csn6     | Csn4     | 75       | 251      | 0.72   | 40.88    | 0   |
| LGKLYLEREEYGK-FYLAKHSGR-a3-b5                      | Csn2     | Cul3     | 157      | 579      | 0.56   | 40.03    | 0   |
| TISAGKVNLGAFR-ANQYKENHNR-a6-b5                     | Csn5     | Csn7     | 180      | 199      | 0.26   | 38.74    | 0   |
| MQHNVLVAEVTQQLKAR-WLKTR-a15-b3                     | Cul3     | Rbx1     | 768      | 145      | 0.31   | 38.51    | 0   |
| RFYLAKHSGR-LGKLYLER-a6-b3                          | Cul3     | Csn2     | 579      | 157      | 0.8    | 37.22    | 0   |
| AMDQEITVNPQFVQKSMGSQEDDSGNKPSSYS-NQIHVKSPPR-a15-b6 | Csn3     | Csn1     | 443      | 447      | 0.3    | 35.74    | 0   |
