# Supplementary material for: Structural and kinetic analysis of the COP9-Signalosome activation and the cullin-RING ubiquitin ligase deneddylation cycle
Source: eLife journal article supplement (doi:10.7554/elife.12102), 2016-03-31

# Figure Supplement 5

**S5A**

**Multi Turnover Deneddylation**  
Cul1-N8/Rbx1 - CSN<sup>4ΔN1-297</sup>

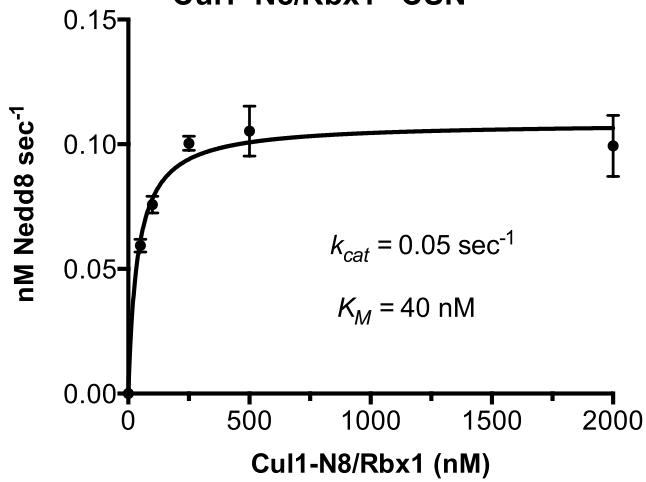

**S5B**

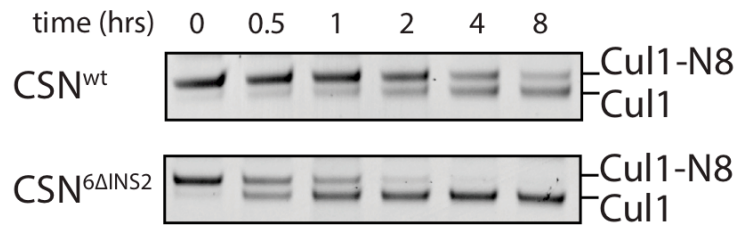

**S5C**

**Multi Turnover Deneddylation**

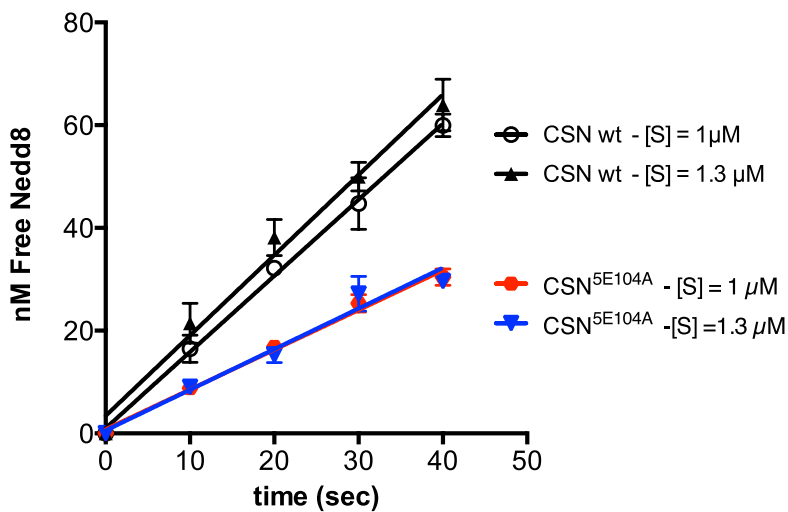

**S5D**

**Single Turnover Deneddylation**

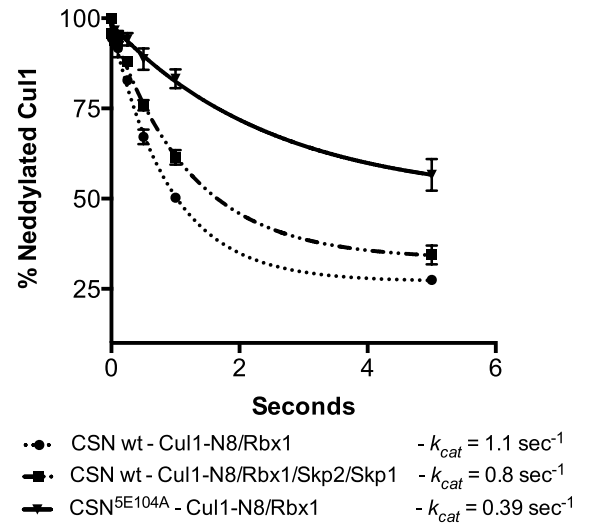

**S5E**

**Single Turnover Deneddylation**

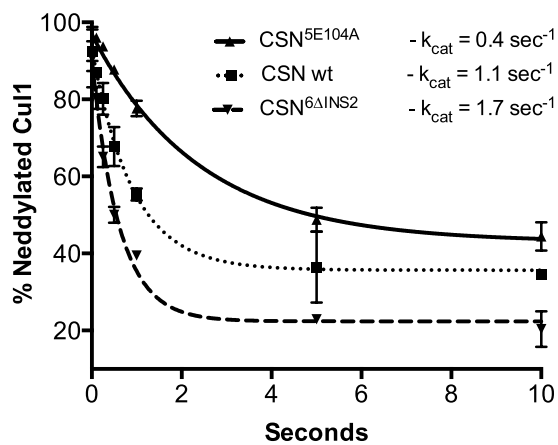

**S5F**

**Multi Turnover Deneddylation**  
Cul1-N8/Rbx1 - CSN<sup>5T103I</sup>

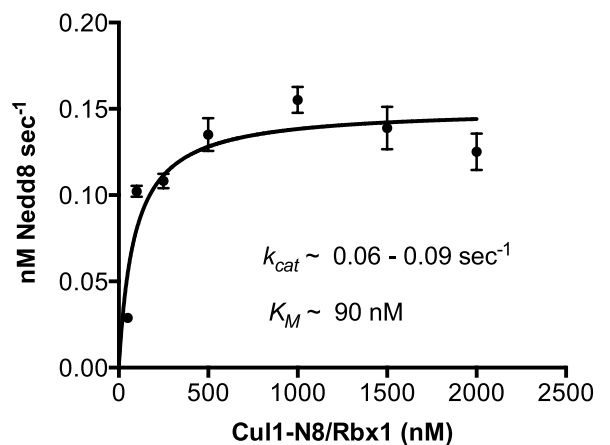

Supplement: supp [file elife-12102-supp-v1.zip]
