# Supplementary figures and images for: Structural and kinetic analysis of the COP9-Signalosome activation and the cullin-RING ubiquitin ligase deneddylation cycle
Source: eLife journal article supplement (doi:10.7554/elife.12102), 2016-03-31

**Figure Supplement 1**

**S1A**

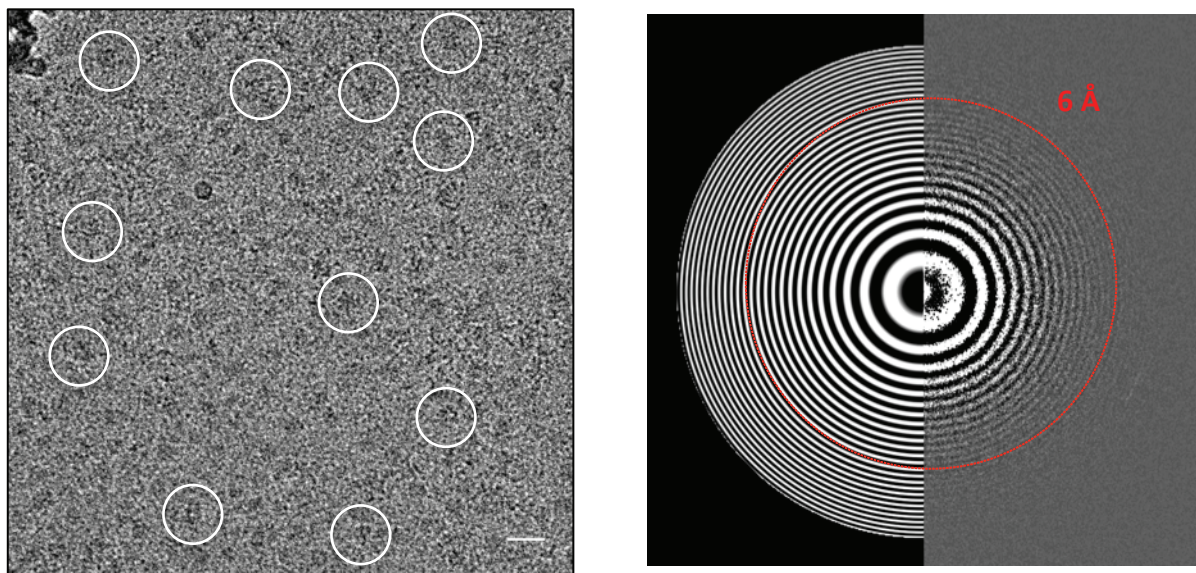

**S1B**

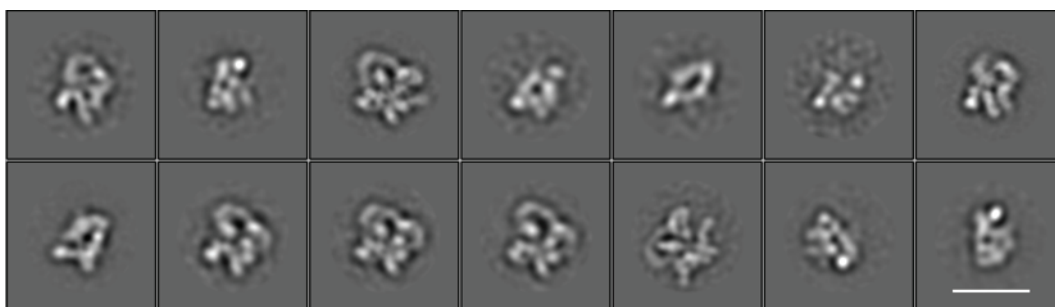

**S1C**

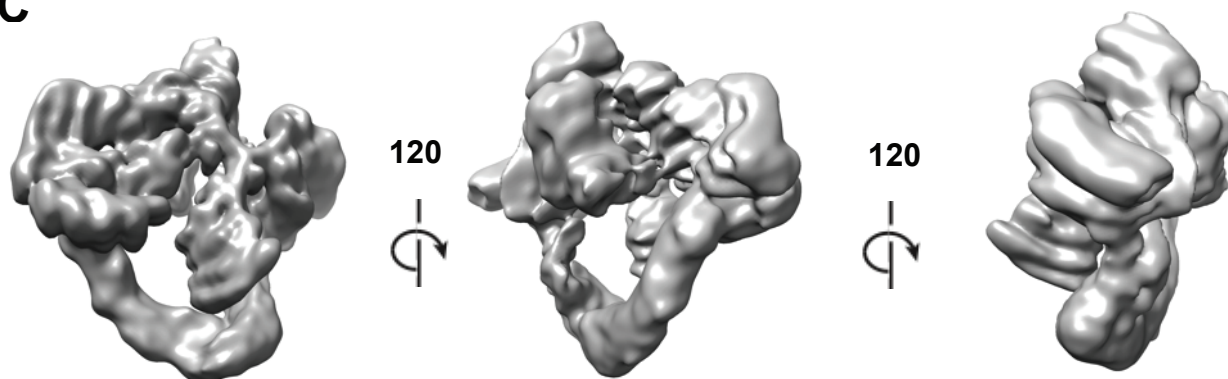

Figure Supplement 1

S1D

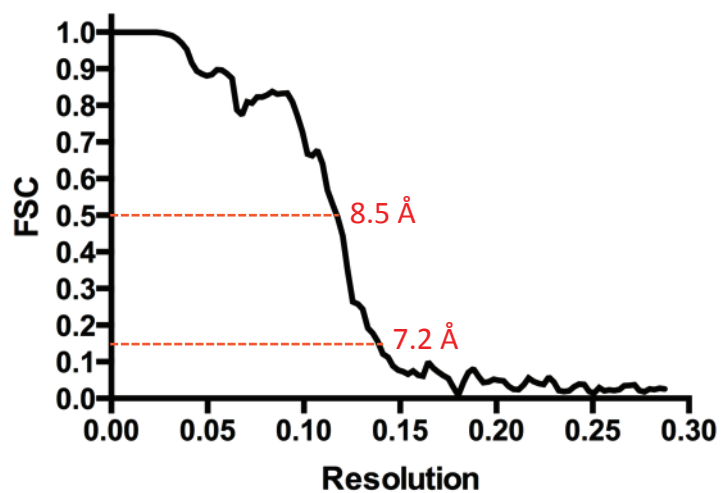

S1E

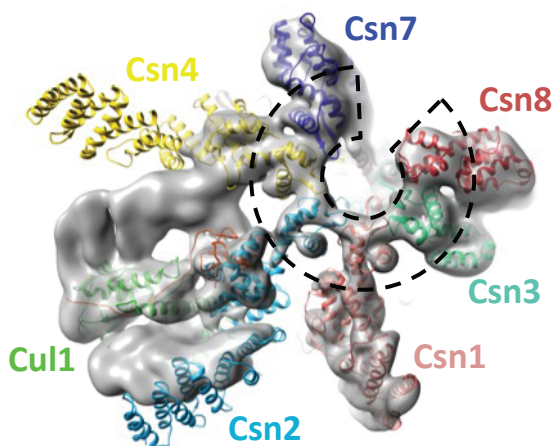

S1F

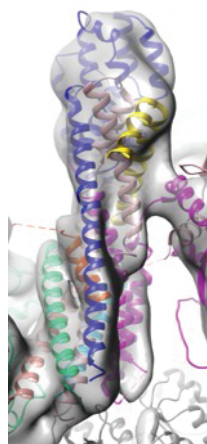

S1G

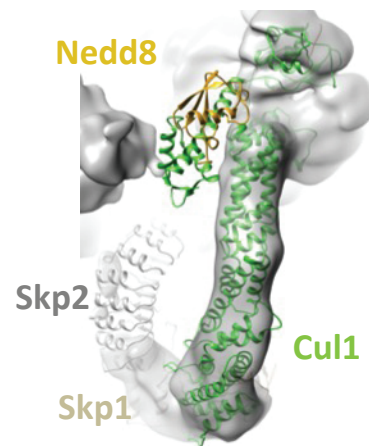

S1H

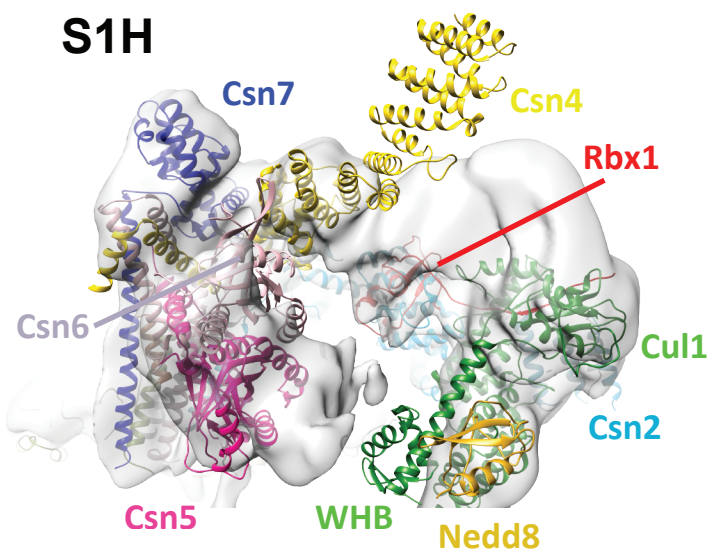

S1I

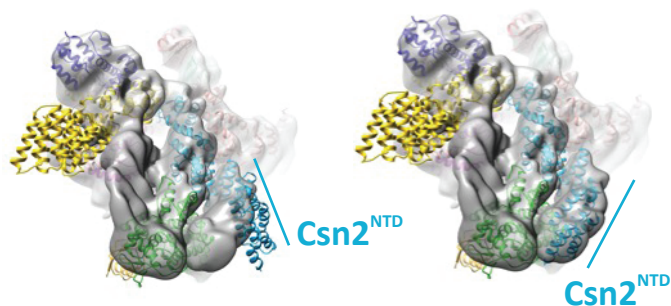

# Figure Supplement 1

**S1J**

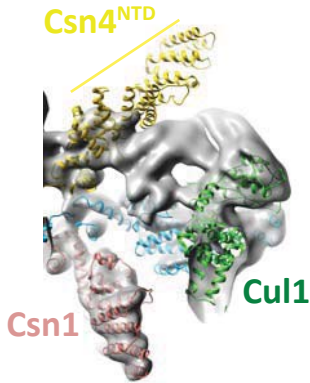

**S1K**

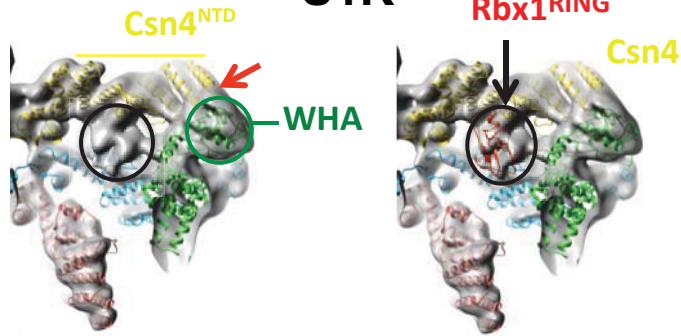

**S1L**

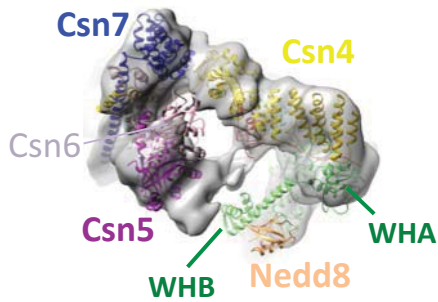

**S1M**

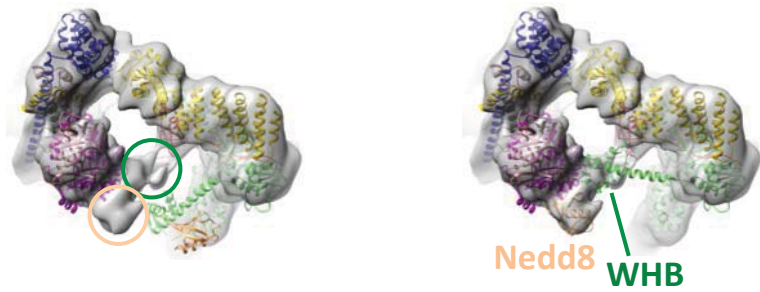

**S1N**

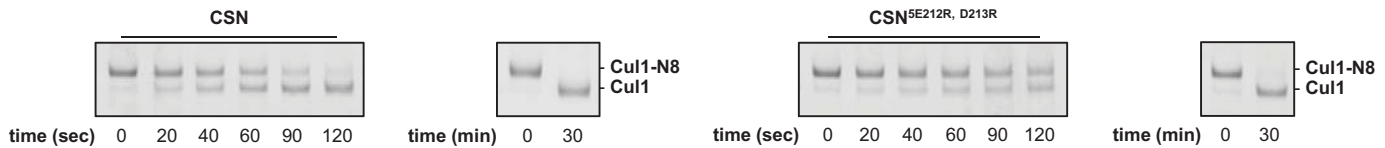

**S1O**

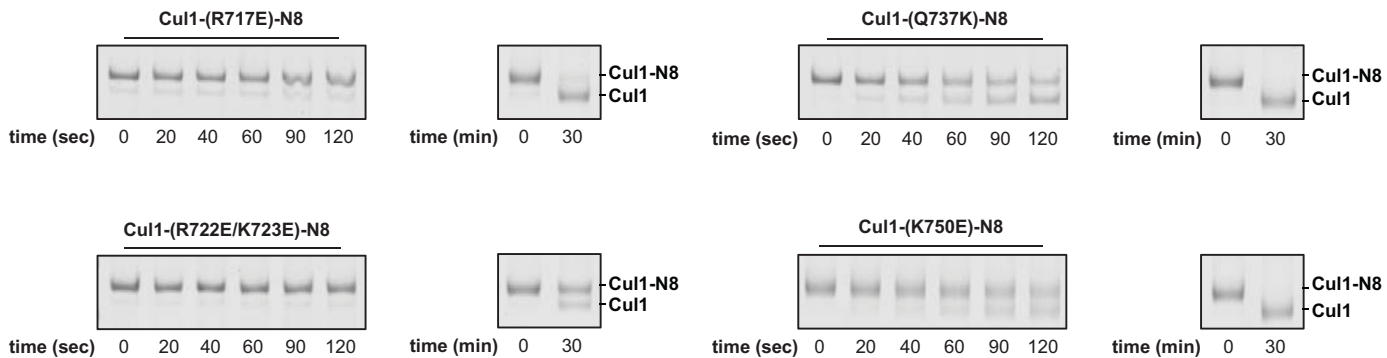

Supplement: supp [file elife-12102-supp-v1.zip]

# Figure Supplement 3

**S3A**

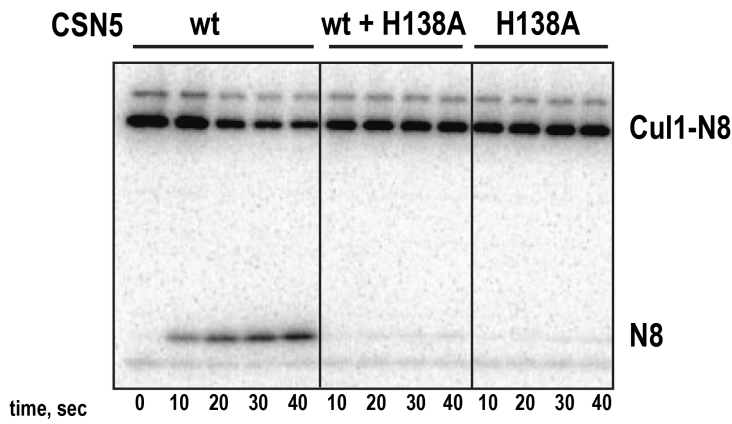

**S3B**

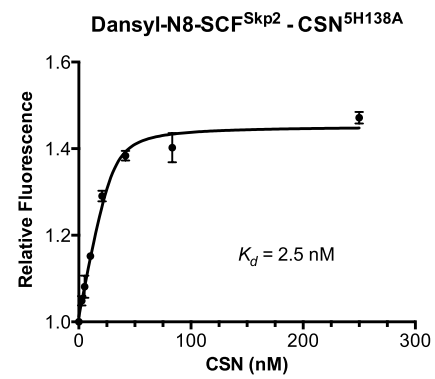

**S3C**

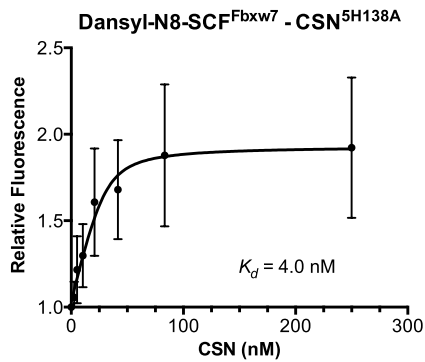

**S3D**

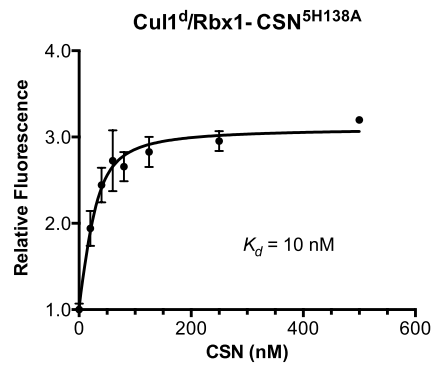

**S3E**

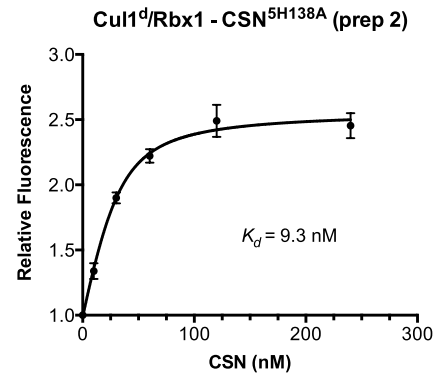

**S3F**

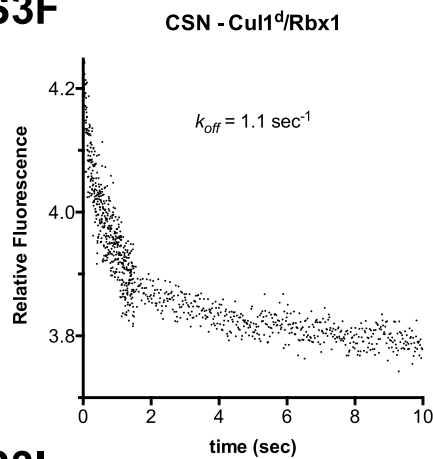

**S3G**

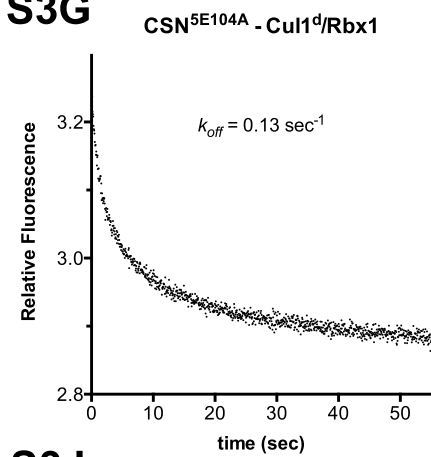

**S3H**

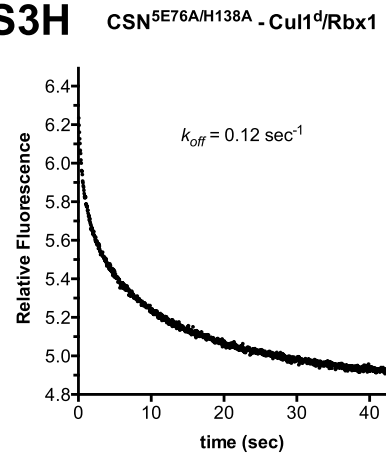

**S3I**

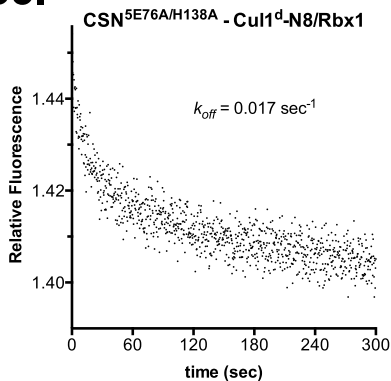

**S3J**

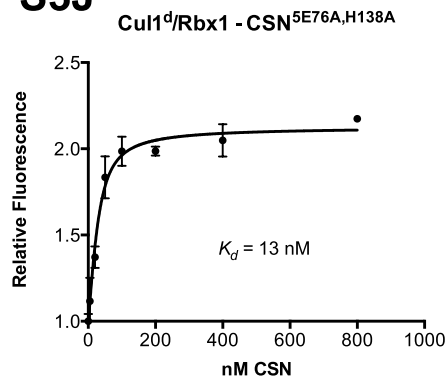

**S3K**

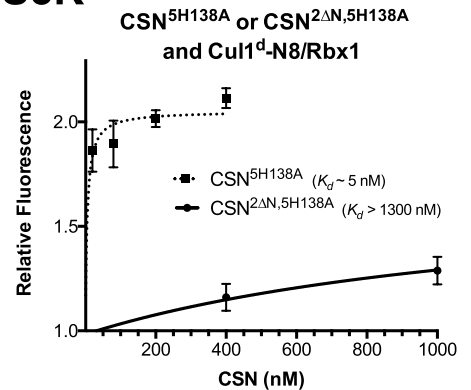

# Figure Supplement 3

**S3L**

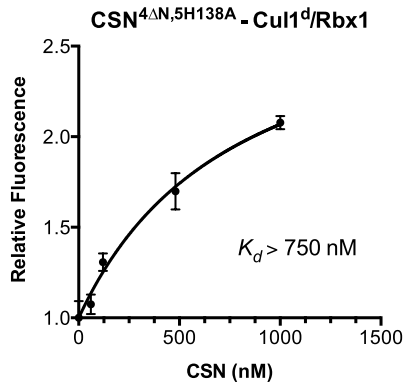

**S3M**

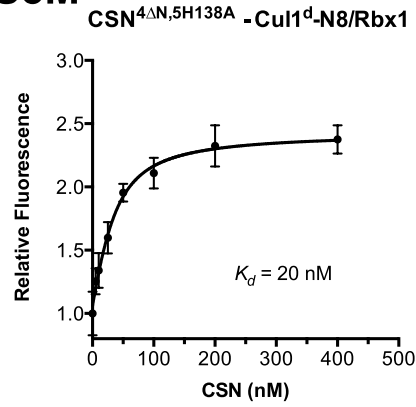

**S3N**

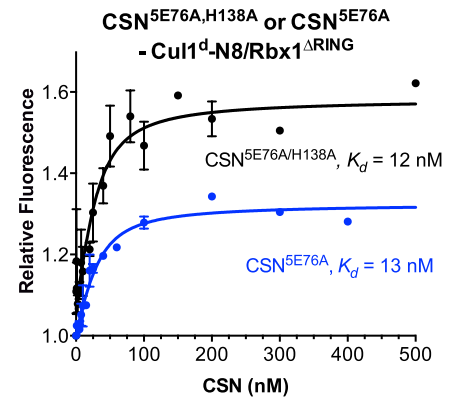

**S3O**

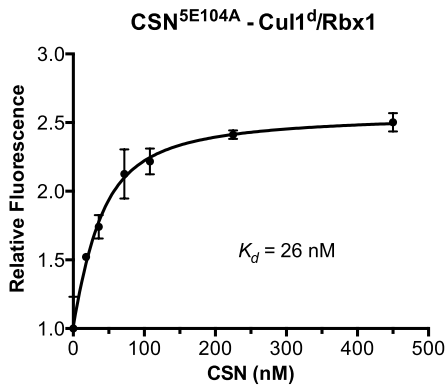

**S3P**

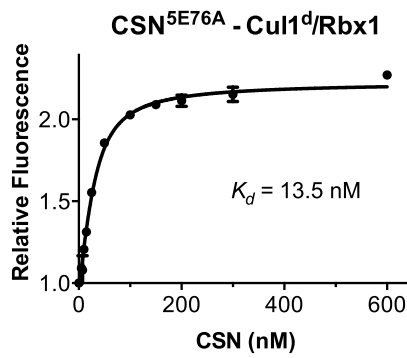

**S3Q**

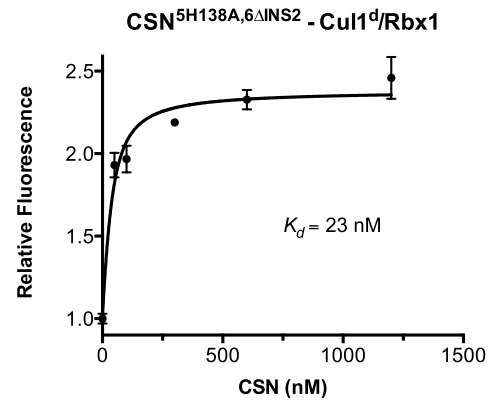

**S3R**

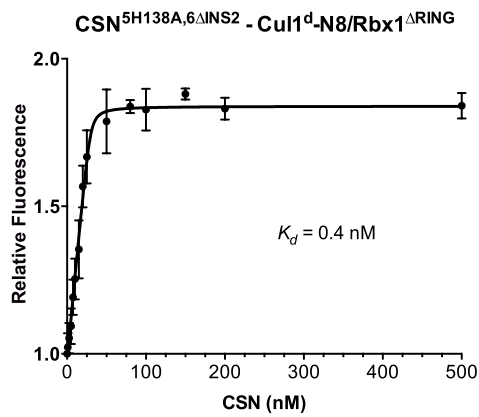

**S3S**

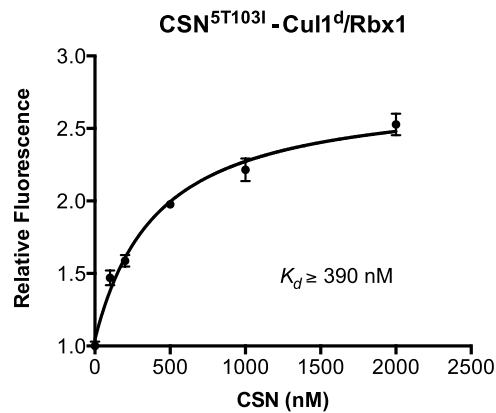

Supplement: supp [file elife-12102-supp-v1.zip]

## Figure Supplement 2

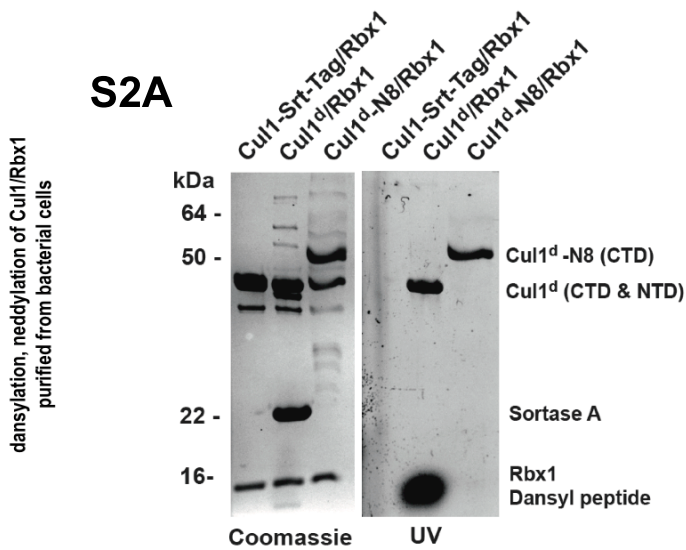

## S2B

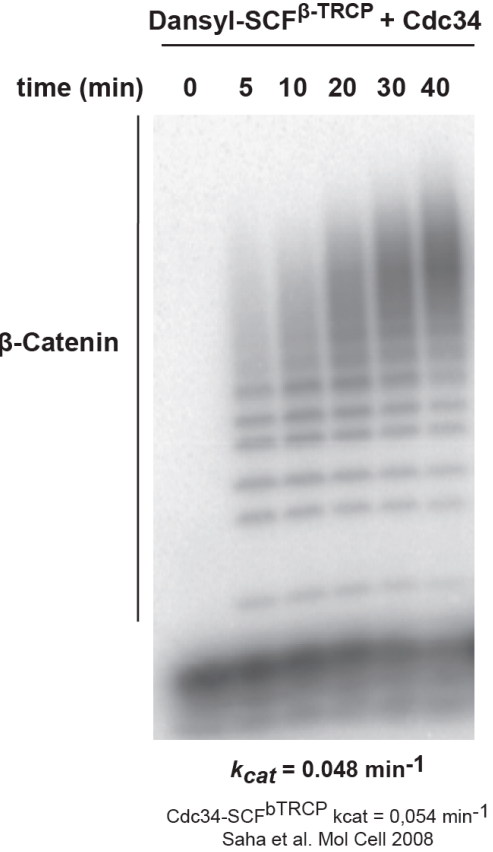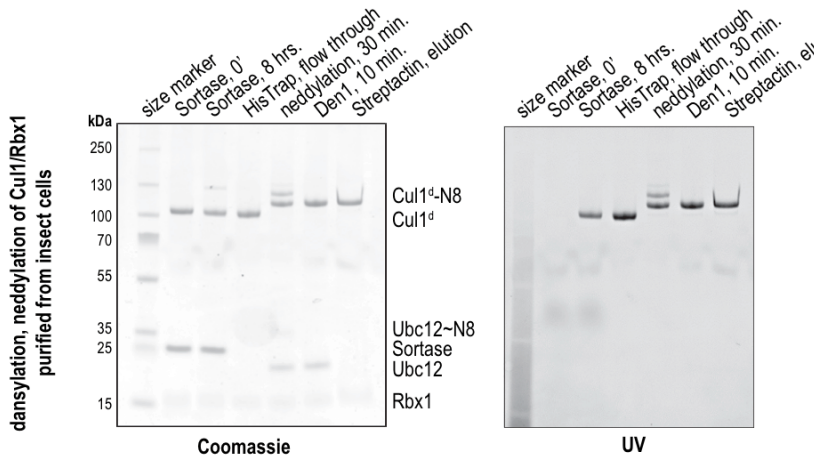

## S2C

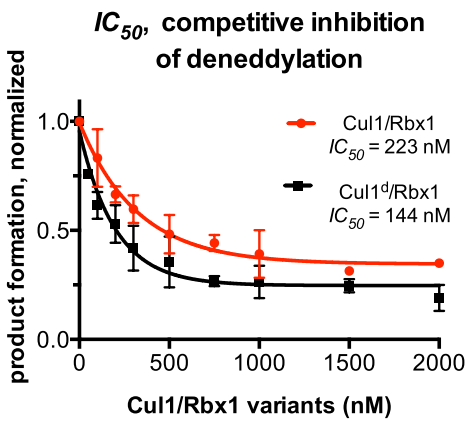

## S2D

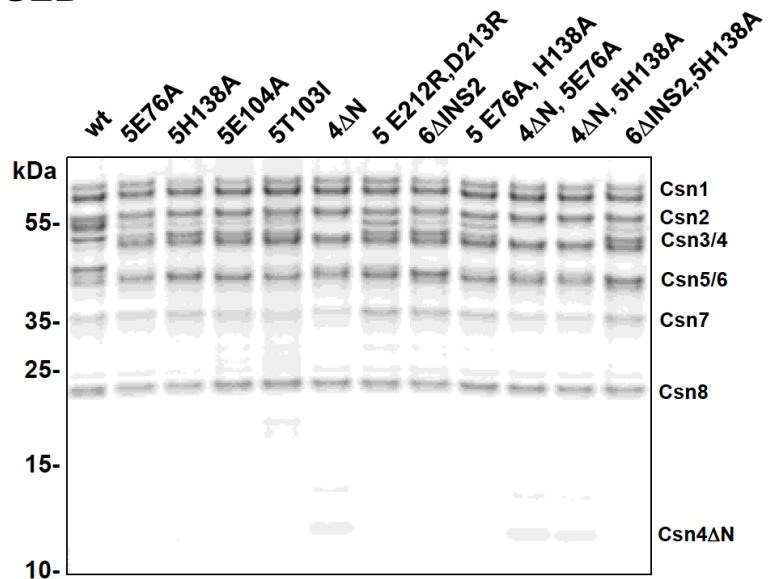

## Figure Supplement 2

**S2E**

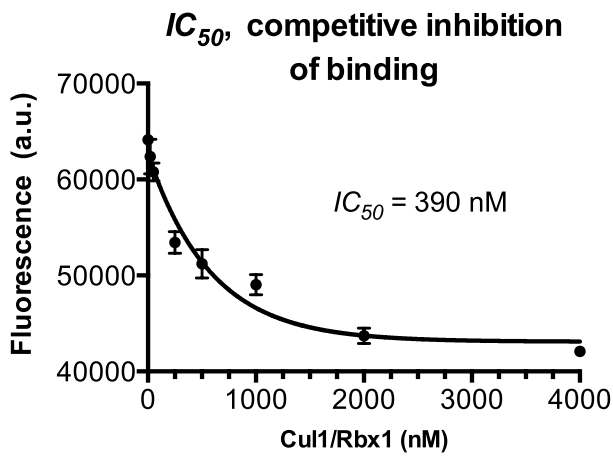

**S2F**

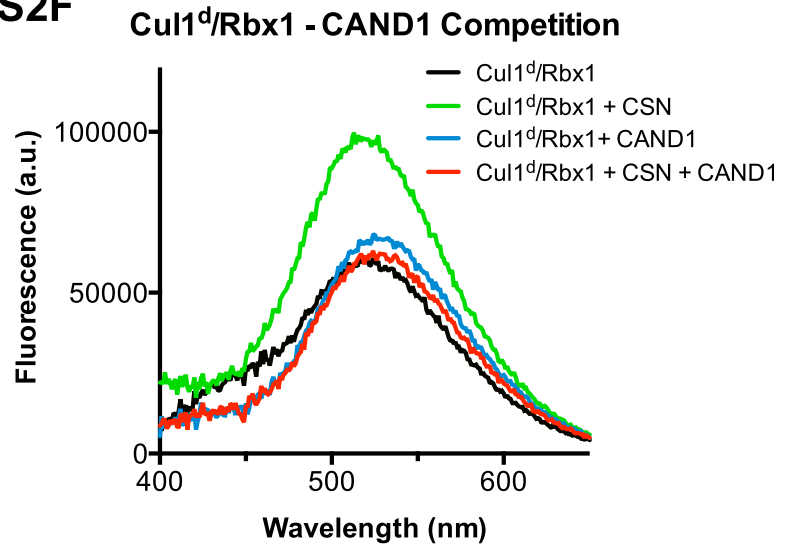

**S2G**

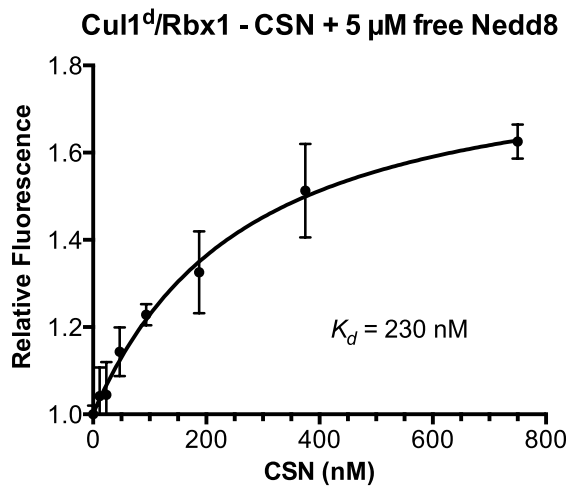

**S2H**

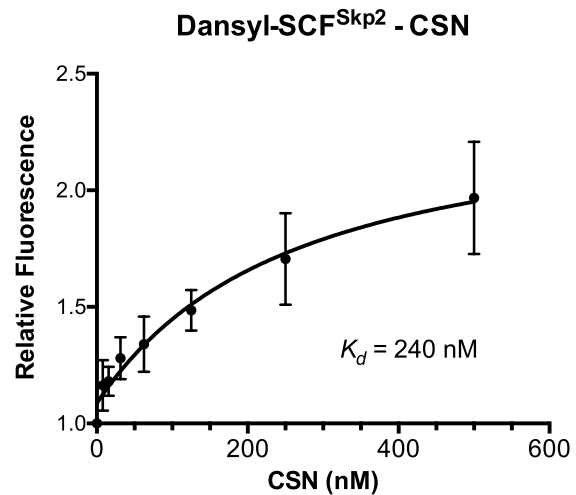

**S2I**

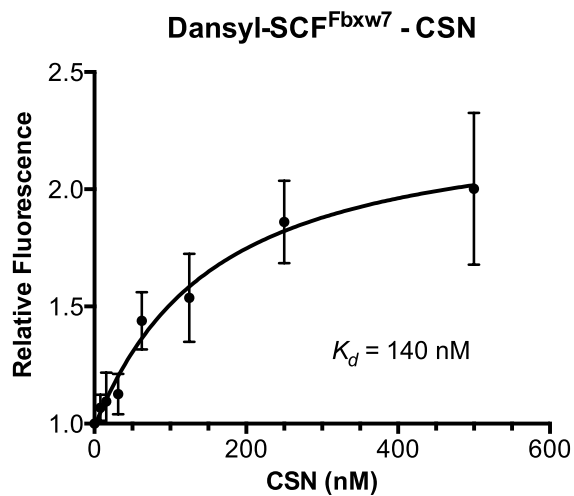

Supplement: supp [file elife-12102-supp-v1.zip]

S4A

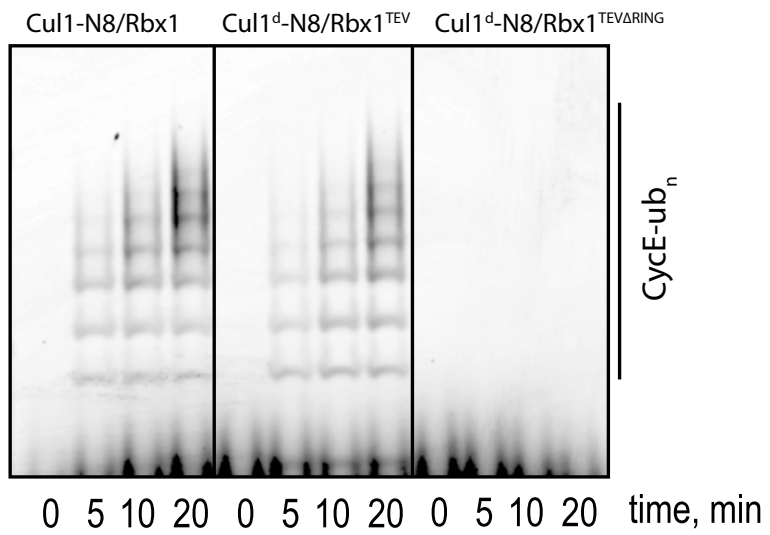

S4B

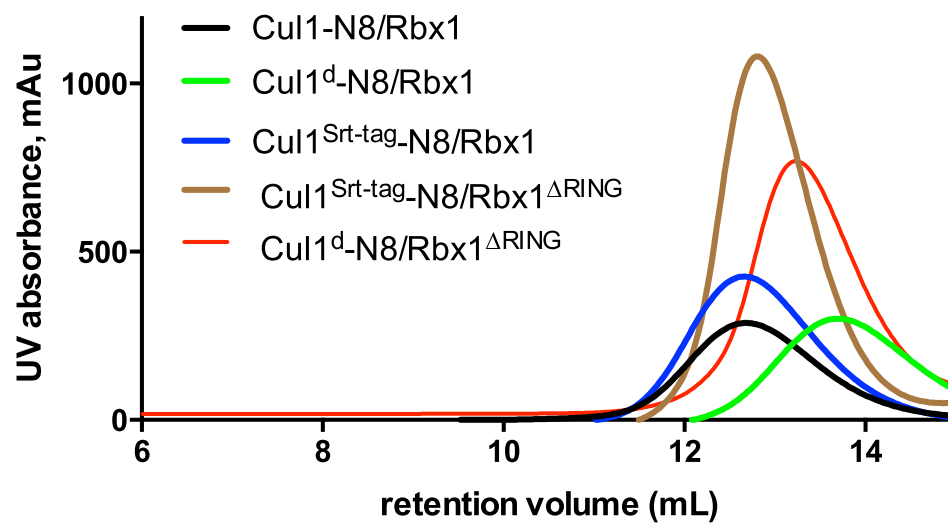

Supplement: supp [file elife-12102-supp-v1.zip]

**S6A**

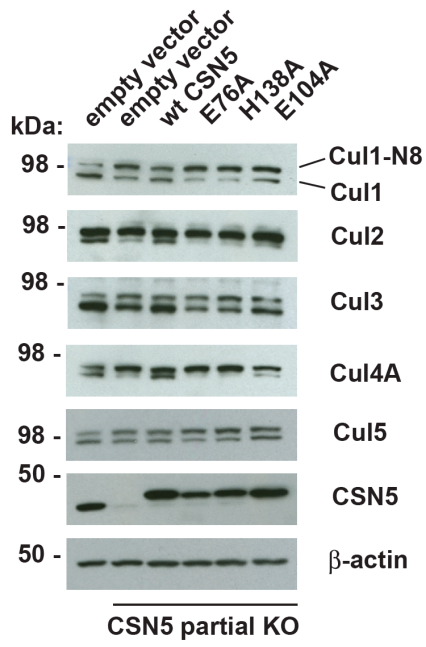

**S6B**

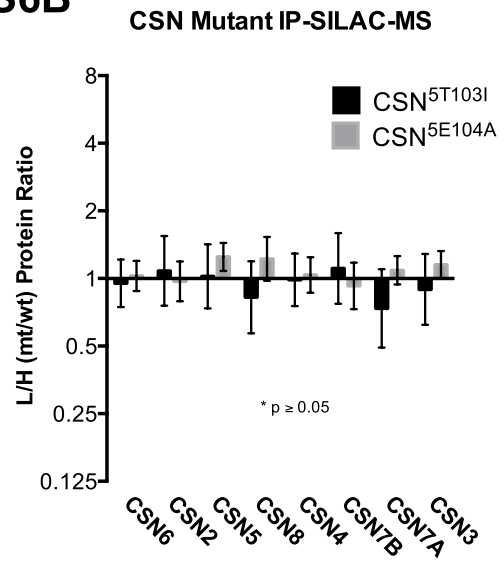

Supplement: supp [file elife-12102-supp-v1.zip]
